# Supplementary material for: Strategy of metal iron doping and green-mediated ZnO nanoparticles: dissolubility, antibacterial and cytotoxic traits
Source: Royal Society of Chemistry journal article supplement (doi:10.1039/c7tx00093f), 2017-01-01
Supplement: c7tx00093f1.pdf [file c7tx00093f1.pdf]

**SUPPLEMENTARY:**

**FIGURE:**

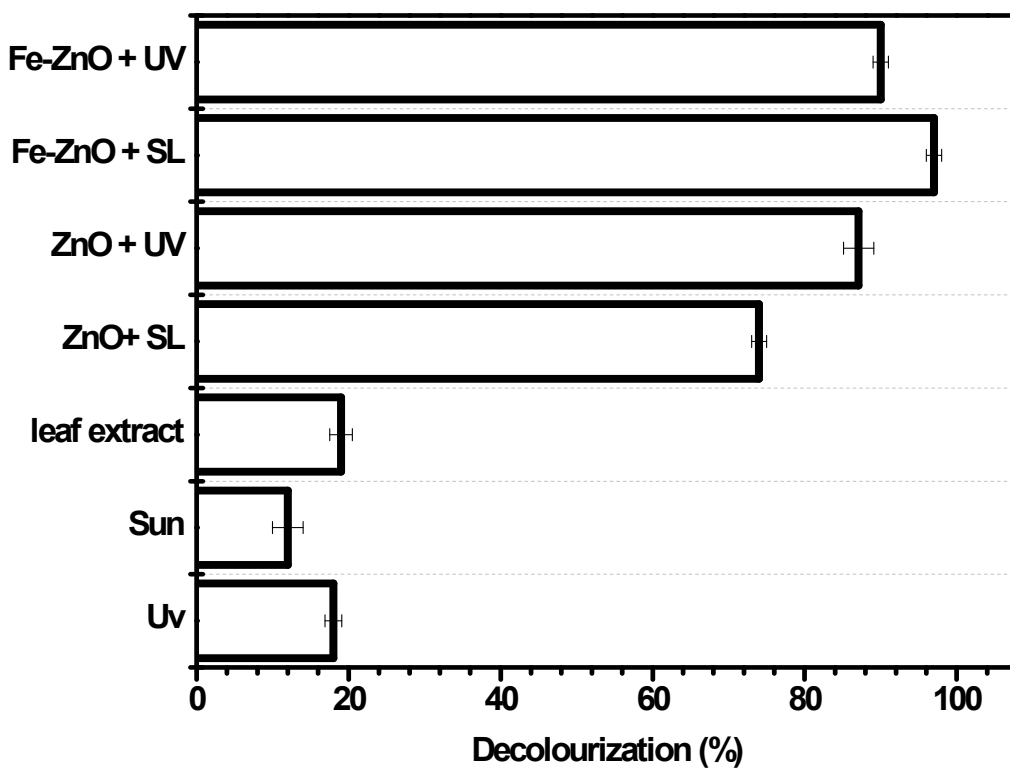

**Figure S1. Percentage decolourization of 50 ppm Indigo carmine dye using 25mg/L of ZnO and Fe-doped ZnO, NPs at 4 h under sunlight and UV.**
